# Supplementary material for: ABCC8-Related Maturity-Onset Diabetes of the Young (MODY12): Clinical Features and Treatment Perspective
Source: Springer Nature journal article supplement (doi:10.1007/s13300-016-0192-9), 2016-08-18

Fig. S1. The p.Ala1457Thr mutation detected in the proband.

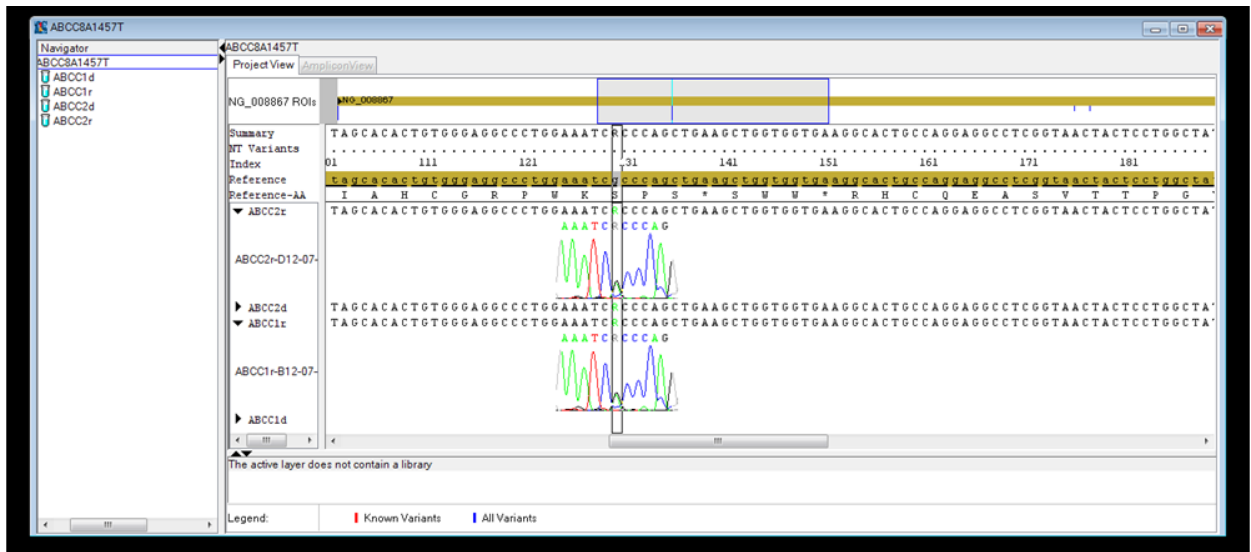

Fig. S2. p.Ala1457Thr mutation in the *PolyPhen-2* software.

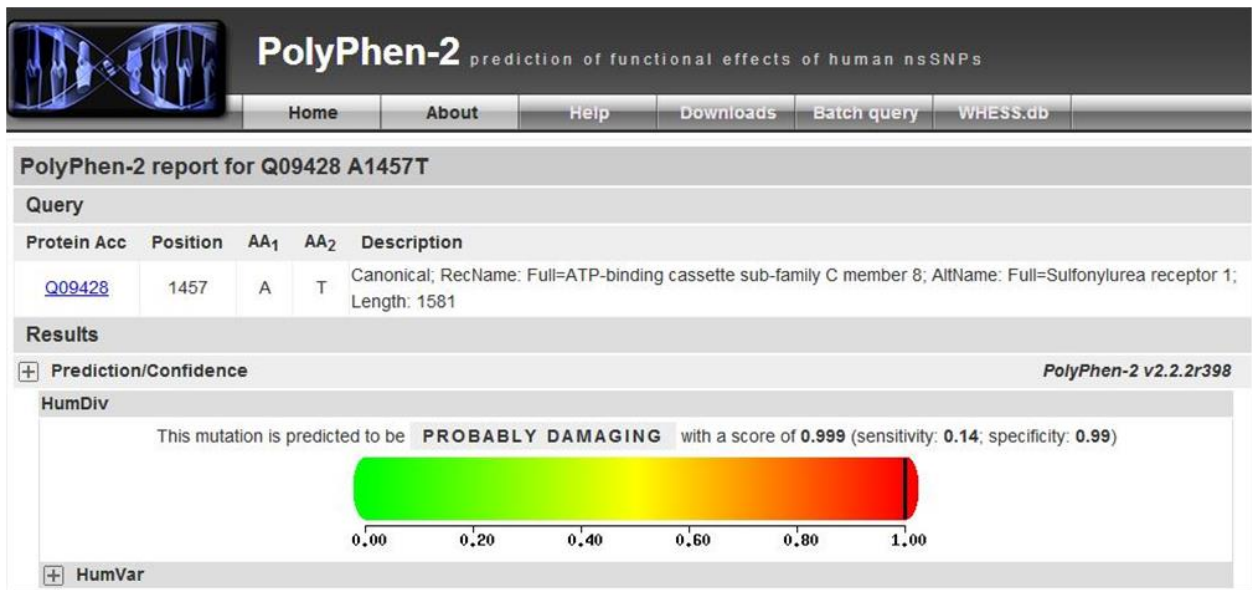

Supplement: MOESM1 [file 10597938]
